# Supplementary material for: Large-scale computational assembly of ionic liquid/MOF composites: synergistic effect in the wire-tube conformation for efficient CO2/CH4 separation
Source: Royal Society of Chemistry journal article supplement (doi:10.1039/c9ta01752f), 2019-01-01
Supplement: c9ta01752f1.pdf [file c9ta01752f1.pdf]

## Supplementary Information

Large-scale computational assembly of ionic liquid/MOF composites:  
synergistic effect in wire-tube conformation for efficient CO<sub>2</sub>/CH<sub>4</sub>  
separation

Youshi Lan,<sup>a</sup> Tongan Yan,<sup>a</sup> Minman Tong,<sup>\*b</sup> and Chongli Zhong<sup>\*a,c</sup>

<sup>a</sup>State Key Laboratory of Organic-Inorganic Composites, Beijing University of Chemical  
Technology, Beijing 100029, China.

<sup>b</sup>School of Chemistry and Materials Science, Jiangsu Normal University, Xuzhou 221116, China.

<sup>c</sup>School of Chemistry and Chemical Engineering, Tianjin Polytechnic University, Tianjin 300387,  
China

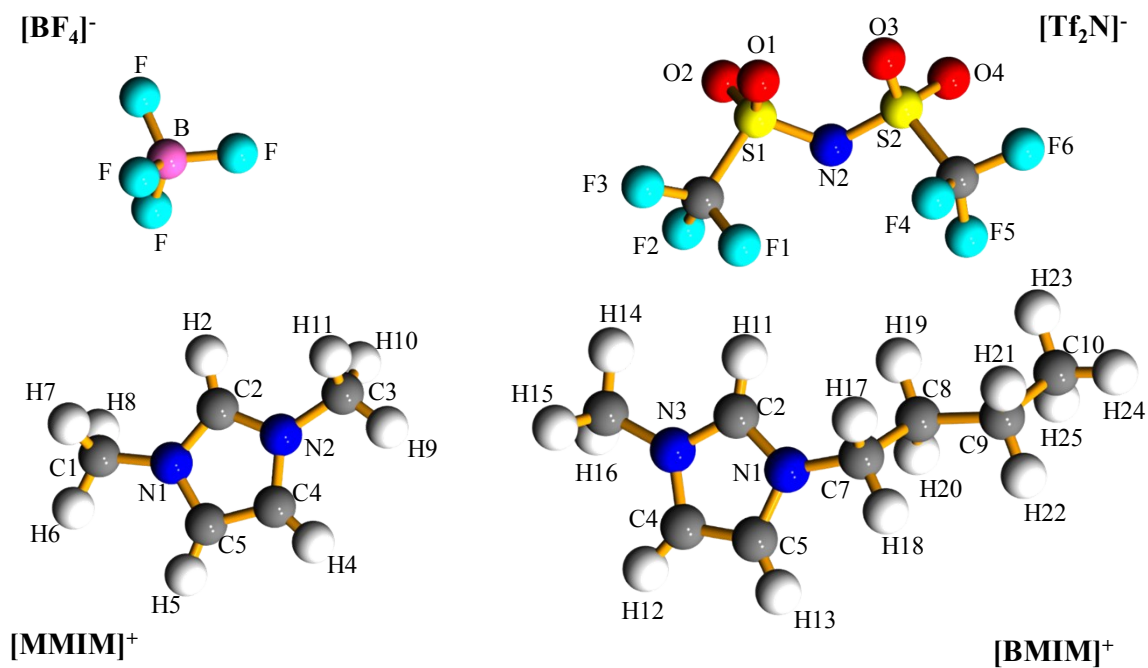

**Fig. S1** Configuration of ILs in this work and corresponding atomic IDs.

**Table S1.** Force field parameters and point charges for the ionic liquids studied in this work.

| Atomic IDs                          | Atomic types | $\epsilon/k_B$ (K) | $\sigma$ (nm) | $q$ (e) |
|-------------------------------------|--------------|--------------------|---------------|---------|
| <b>[MMIM]<sup>+</sup></b>           |              |                    |               |         |
| N1                                  | NA           | 85.55              | 0.3250        | 0.173   |
| C5                                  | CW           | 43.28              | 0.3400        | -0.198  |
| C4                                  | CW           | 43.28              | 0.3400        | -0.198  |
| N2                                  | NA           | 85.55              | 0.3250        | 0.173   |
| C2                                  | CR           | 43.28              | 0.3400        | 0.144   |
| C1                                  | CT           | 55.05              | 0.3400        | 0.384   |
| H5                                  | H4           | 7.55               | 0.2511        | 0.238   |
| H4                                  | H4           | 7.55               | 0.2511        | 0.238   |
| C3                                  | CT           | 55.05              | 0.3400        | 0.384   |
| H2                                  | H5           | 7.55               | 0.2422        | 0.256   |
| H8                                  | H1           | 7.90               | 0.2471        | 0.17    |
| H7                                  | H1           | 7.90               | 0.2471        | 0.17    |
| H6                                  | H1           | 7.90               | 0.2471        | 0.17    |
| H10                                 | H1           | 7.90               | 0.2471        | 0.17    |
| H11                                 | H1           | 7.90               | 0.2471        | 0.17    |
| H9                                  | H1           | 7.90               | 0.2471        | 0.17    |
| <b>[BF<sub>4</sub>]<sup>-</sup></b> |              |                    |               |         |
| B                                   | B            | 47.81              | 0.3581        | 1.134   |
| F                                   | F            | 30.70              | 0.3118        | -0.533  |

| [BMIM] <sup>+</sup>              |    |                                                  |        |            |
|----------------------------------|----|--------------------------------------------------|--------|------------|
| C5                               | CW | 43.28                                            | 0.3400 | -0.1885    |
| H13                              | H4 | 7.55                                             | 0.2511 | 0.2506     |
| C4                               | CW | 43.28                                            | 0.3400 | -0.1415    |
| H12                              | H4 | 7.55                                             | 0.2511 | 0.2324     |
| C2                               | CR | 43.28                                            | 0.3400 | 0.0231     |
| H11                              | H5 | 7.55                                             | 0.2421 | 0.2291     |
| N1                               | NA | 85.55                                            | 0.3250 | 0.0077     |
| N3                               | NA | 85.55                                            | 0.3250 | 0.0785     |
| C7                               | CT | 55.05                                            | 0.3400 | -0.0118    |
| H17                              | H1 | 7.90                                             | 0.2471 | 0.0852     |
| H18                              | H1 | 7.90                                             | 0.2471 | 0.0852     |
| C6                               | CT | 55.05                                            | 0.3400 | -0.1489    |
| H14                              | H1 | 7.90                                             | 0.2471 | 0.1229     |
| H15                              | H1 | 7.90                                             | 0.2471 | 0.1229     |
| H16                              | H1 | 7.90                                             | 0.2471 | 0.1229     |
| C8                               | CT | 55.05                                            | 0.3400 | -0.0464    |
| H19                              | HC | 7.90                                             | 0.2650 | 0.043      |
| H20                              | HC | 7.90                                             | 0.2650 | 0.043      |
| C9                               | CT | 55.05                                            | 0.3400 | 0.0126     |
| H21                              | HC | 7.90                                             | 0.2650 | 0.0237     |
| H22                              | HC | 7.90                                             | 0.2650 | 0.0237     |
| C10                              | CT | 55.05                                            | 0.3400 | -0.0402    |
| H23                              | HC | 7.90                                             | 0.2650 | 0.0236     |
| H24                              | HC | 7.90                                             | 0.2650 | 0.0236     |
| H25                              | HC | 7.90                                             | 0.2650 | 0.0236     |
| [Tf <sub>2</sub> N] <sup>-</sup> |    |                                                  |        |            |
| C11                              | C  | 33.21                                            | 0.3500 | 0.3603     |
| C12                              | C  | 33.21                                            | 0.3500 | 0.3369     |
| N2                               | N  | 85.55                                            | 0.3250 | -0.7148    |
| S1                               | S  | 125.81                                           | 0.3550 | 1.0227     |
| S2                               | S  | 125.81                                           | 0.3550 | 1.0282     |
| O1                               | O  | 105.68                                           | 0.2960 | -0.5576    |
| O2                               | O  | 105.68                                           | 0.2960 | -0.5552    |
| O3                               | O  | 105.68                                           | 0.2960 | -0.5574    |
| O4                               | O  | 105.68                                           | 0.2960 | -0.5559    |
| F1                               | F  | 26.67                                            | 0.2950 | -0.1437    |
| F2                               | F  | 26.67                                            | 0.2950 | -0.1035    |
| F3                               | F  | 26.67                                            | 0.2950 | -0.1655    |
| F4                               | F  | 26.67                                            | 0.2950 | -0.1377    |
| F5                               | F  | 26.67                                            | 0.2950 | -0.0977    |
| F6                               | F  | 26.67                                            | 0.2950 | -0.1592    |
| Bond types                       |    | $K_b$ (kcal·mol <sup>-1</sup> ·Å <sup>-2</sup> ) |        | $b_0$ (nm) |

|                |                                                         |                |              |
|----------------|---------------------------------------------------------|----------------|--------------|
| NA-CR          | 477.00                                                  | 0.1343         |              |
| NA-CW          | 427.00                                                  | 0.1381         |              |
| NA-CT          | 280.11                                                  | 0.1472         |              |
| CR-H5          | 367.00                                                  | 0.1080         |              |
| CW-CW          | 409.89                                                  | 0.1343         |              |
| CW-H4          | 367.00                                                  | 0.1080         |              |
| CT-H1          | 340.00                                                  | 0.1090         |              |
| CT-CT          | 310.00                                                  | 0.1526         |              |
| CT-HC          | 340.00                                                  | 0.1090         |              |
| C-F            | 441.80                                                  | 0.1323         |              |
| C-S            | 235.42                                                  | 0.1818         |              |
| S-O            | 637.07                                                  | 0.1442         |              |
| N-S            | 372.01                                                  | 0.1570         |              |
| B-F            | 289.91                                                  | 0.1389         |              |
| Angle types    | $K_\theta$ (kcal·mol <sup>-1</sup> ·rad <sup>-2</sup> ) | $\theta_0$ (°) |              |
| CR-NA-CW       | 70.00                                                   | 120.00         |              |
| CR-NA-CT       | 49.95                                                   | 126.30         |              |
| CW-NA-CT       | 49.95                                                   | 125.70         |              |
| NA-CR-NA       | 70.00                                                   | 120.00         |              |
| NA-CR-H5       | 50.00                                                   | 120.00         |              |
| NA-CW-CW       | 119.98                                                  | 107.10         |              |
| NA-CW-H4       | 50.00                                                   | 120.00         |              |
| CW-CW-H4       | 30.11                                                   | 130.70         |              |
| NA-CT-H1       | 54.97                                                   | 109.50         |              |
| NA-CT-CT       | 70.03                                                   | 112.20         |              |
| H1-CT-H1       | 35.00                                                   | 109.50         |              |
| CT-CT-H1       | 50.00                                                   | 109.50         |              |
| CT-CT-CT       | 40.00                                                   | 109.50         |              |
| HC-CT-HC       | 35.00                                                   | 109.50         |              |
| CT-CT-HC       | 50.00                                                   | 109.50         |              |
| F-C-F          | 93.33                                                   | 107.10         |              |
| S-C-F          | 82.93                                                   | 111.80         |              |
| C-S-O          | 103.97                                                  | 102.60         |              |
| O-S-O          | 115.80                                                  | 118.50         |              |
| O-S-N          | 94.29                                                   | 113.60         |              |
| C-S-N          | 97.51                                                   | 100.20         |              |
| S-N-S          | 80.19                                                   | 125.60         |              |
| F-B-F          | 49.95                                                   | 109.50         |              |
| Dihedral types | $K_\phi$ (kcal·mol <sup>-1</sup> )                      | $n$            | $\phi_0$ (°) |
| CT-CT-CT-CT    | 0.18                                                    | 3              | 0.00         |
| CT-CT-CT-NA    | 0.25                                                    | 3              | 0.00         |
| CT-CT-CT-HC    | 0.16                                                    | 3              | 0.00         |
| CT-CT-CT-H1    | 0.16                                                    | 3              | 0.00         |

|                |                                 |                                 |                                 |
|----------------|---------------------------------|---------------------------------|---------------------------------|
| NA-CT-CT-HC    | 0.16                            | 3                               | 0.00                            |
| HC-CT-CT-HC    | 0.15                            | 3                               | 0.00                            |
| HC-CT-CT-H1    | 0.16                            | 3                               | 0.00                            |
| CT-CT-NA-CW    | -0.18                           | 1                               | 0.00                            |
| CT-CT-NA-CR    | -0.24                           | 1                               | 0.00                            |
| H1-CT-NA-CW    | 0.24                            | 3                               | 0.00                            |
| H1-CT-NA-CR    | 0.16                            | 3                               | 0.00                            |
| NA-CW-CW-NA    | 12.00                           | 2                               | 180.00                          |
| NA-CW-CW-H4    | 1.50                            | 2                               | 180.00                          |
| CW-CW-NA-CT    | 2.00                            | 2                               | 180.00                          |
| CW-CW-NA-CR    | 12.00                           | 2                               | 180.00                          |
| H4-CW-NA-CT    | 1.50                            | 2                               | 180.00                          |
| H4-CW-NA-CR    | 2.00                            | 2                               | 180.00                          |
| NA-CR-NA-CT    | 2.00                            | 2                               | 180.00                          |
| NA-CR-NA-CW    | 12.00                           | 2                               | 180.00                          |
| H5-CR-NA-CT    | 1.50                            | 2                               | 180.00                          |
| H5-CR-NA-CW    | 1.50                            | 2                               | 180.00                          |
| Dihedral types | $V_1$ (kcal·mol <sup>-1</sup> ) | $V_2$ (kcal·mol <sup>-1</sup> ) | $V_3$ (kcal·mol <sup>-1</sup> ) |
| F-C-S-O        | 0.00                            | 0.00                            | 0.35                            |
| S-N-S-O        | 0.00                            | 0.00                            | 0.00                            |
| F-C-S-N        | 0.00                            | 0.00                            | 0.32                            |
| S-N-S-C        | 7.83                            | -2.49                           | -0.76                           |
| Improper types | $K_\psi$ (kcal/mol)             | $n$                             | $\psi_0$ (°)                    |
| CR-CW-NA-CT    | 2.00                            | 2                               | 180.00                          |
| H4-CW-NA-CW    | 1.10                            | 2                               | 180.00                          |
| H5-CR-NA-NA    | 1.10                            | 2                               | 180.00                          |

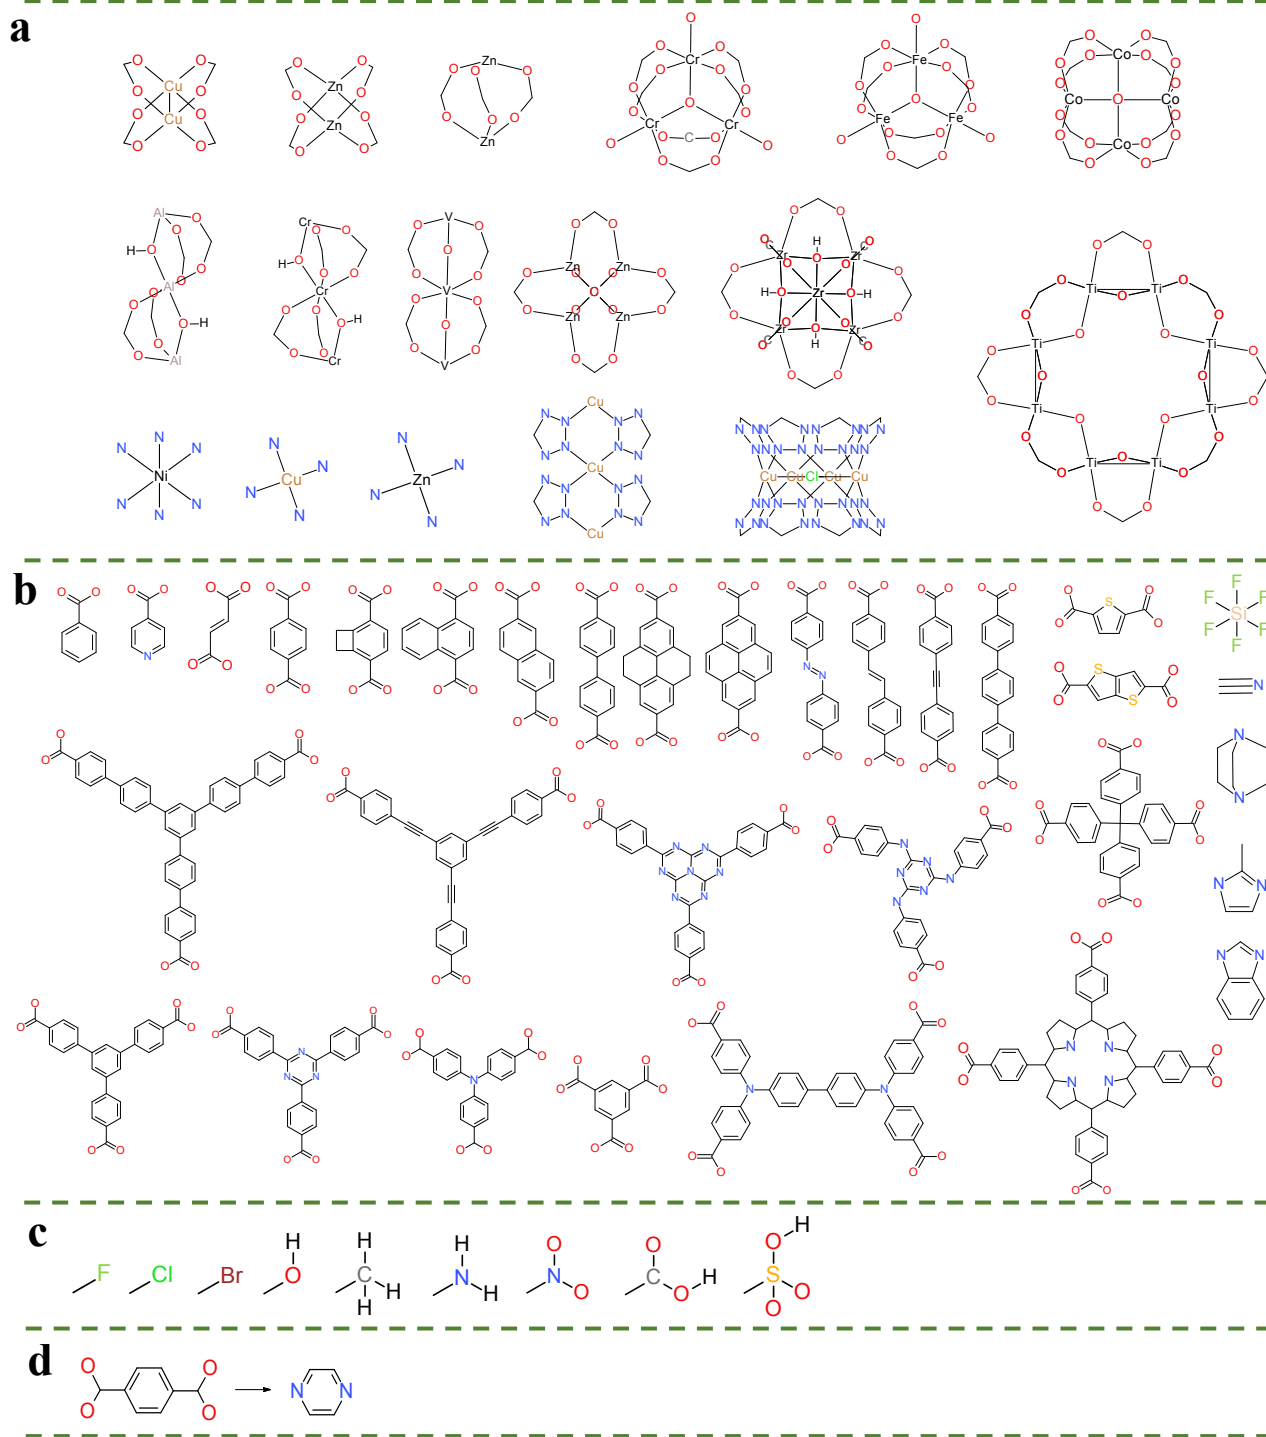

**Fig. S2** Full list of the primary units used to generate the database of MOFs. **a**, 17 metal clusters. **b**, 32 organic linkers. **c**, 9 functional groups. **d**, the carboxylate connection site of all the organic primary units here can be replaced by the nitrogen atom for pyridine connection

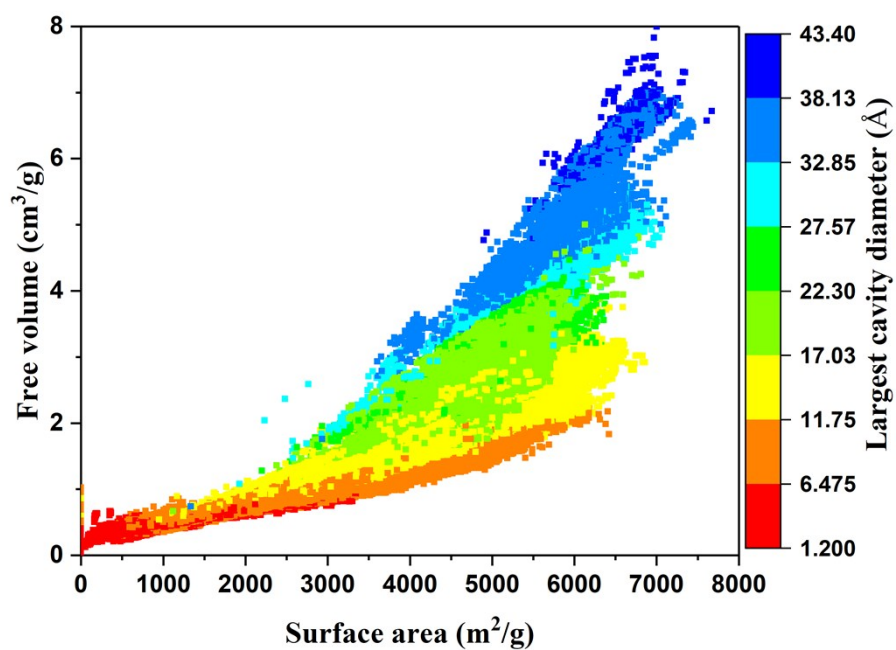

**Fig. S3** Relationship between the surface area and free volume of the generated MOFs in our database, colored by material largest cavity diameter.

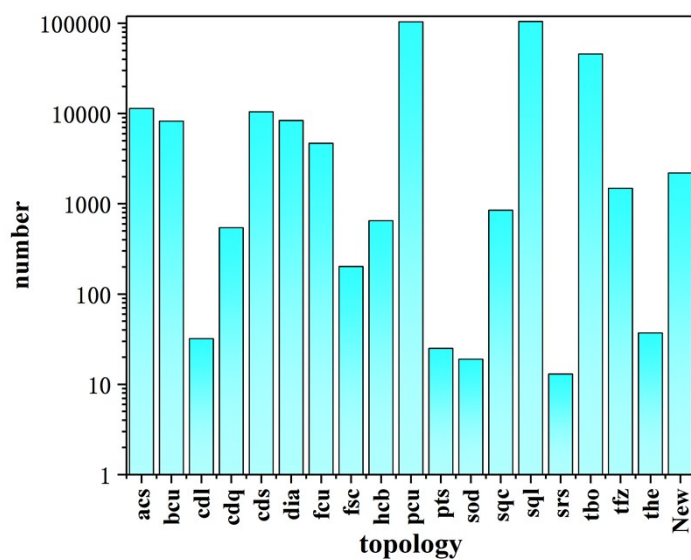

**Fig. S4** Topology distribution of generated MOF database.

**Table S2.** Comparison of the structural energy and CO<sub>2</sub>/CH<sub>4</sub> separation performance of the CBMC- and MD- derived [MMIM][BF<sub>4</sub>]/MOF composites.

| MOFs     | CBMC                   |                                                   |                                                | MD                     |                                                   |                                                |
|----------|------------------------|---------------------------------------------------|------------------------------------------------|------------------------|---------------------------------------------------|------------------------------------------------|
|          | <i>E</i><br>(kcal/mol) | <i>S</i> <sub>CO<sub>2</sub>/CH<sub>4</sub></sub> | <i>N</i> <sub>CO<sub>2</sub></sub><br>(mmol/g) | <i>E</i><br>(kcal/mol) | <i>S</i> <sub>CO<sub>2</sub>/CH<sub>4</sub></sub> | <i>N</i> <sub>CO<sub>2</sub></sub><br>(mmol/g) |
| Cu-BTC   | -832.26                | 11.64                                             | 3.73                                           | -849.16                | 12.15                                             | 4.02                                           |
| IRMOF-1  | -861.63                | 11.99                                             | 2.64                                           | -895.84                | 10.74                                             | 2.28                                           |
| MIL-68Al | -2799.33               | 16.00                                             | 6.54                                           | -2795.92               | 17.50                                             | 6.79                                           |
| UiO-66   | -3972.63               | 19.25                                             | 2.90                                           | -3927.95               | 22.16                                             | 3.12                                           |
| ZIF-8    | -783.78                | 6.21                                              | 2.36                                           | -792.24                | 6.61                                              | 2.49                                           |

**Table S3.** Comparison of the structural energy and CO<sub>2</sub>/CH<sub>4</sub> separation performance of the CBMC- and MD- derived [BMIM][Tf<sub>2</sub>N]/MOF composites.

| MOFs     | CBMC                   |                                                   |                                                | MD                     |                                                   |                                                |
|----------|------------------------|---------------------------------------------------|------------------------------------------------|------------------------|---------------------------------------------------|------------------------------------------------|
|          | <i>E</i><br>(kcal/mol) | <i>S</i> <sub>CO<sub>2</sub>/CH<sub>4</sub></sub> | <i>N</i> <sub>CO<sub>2</sub></sub><br>(mmol/g) | <i>E</i><br>(kcal/mol) | <i>S</i> <sub>CO<sub>2</sub>/CH<sub>4</sub></sub> | <i>N</i> <sub>CO<sub>2</sub></sub><br>(mmol/g) |
| Cu-BTC   | 1373.31                | 5.55                                              | 2.00                                           | 1388.96                | 5.54                                              | 2.04                                           |
| IRMOF-1  | 1373.76                | 3.65                                              | 0.74                                           | 1382.66                | 4.96                                              | 1.06                                           |
| MIL-68Al | 3182.50                | 7.57                                              | 3.09                                           | 3219.48                | 7.34                                              | 3.20                                           |
| UiO-66   | 4822.06                | 9.49                                              | 1.13                                           | 4805.68                | 8.99                                              | 1.07                                           |
| ZIF-8    | 1349.31                | 3.33                                              | 1.08                                           | 1347.40                | 3.64                                              | 1.20                                           |



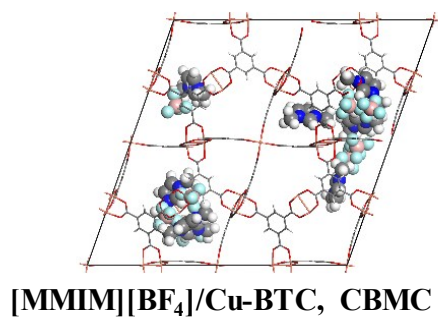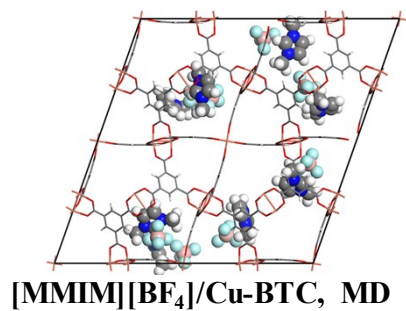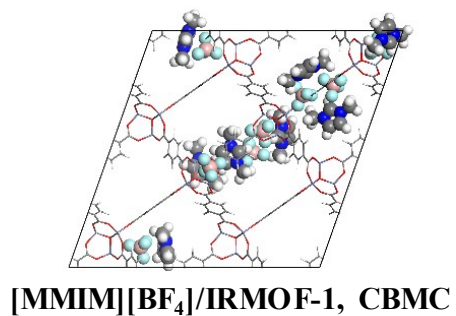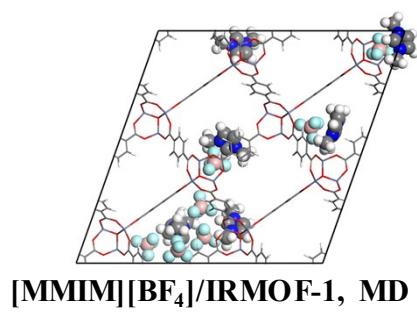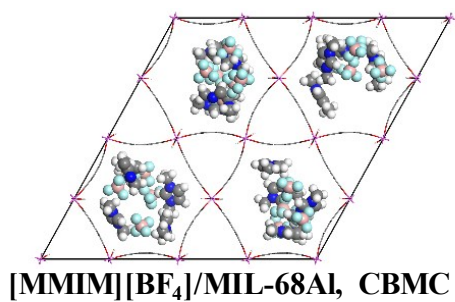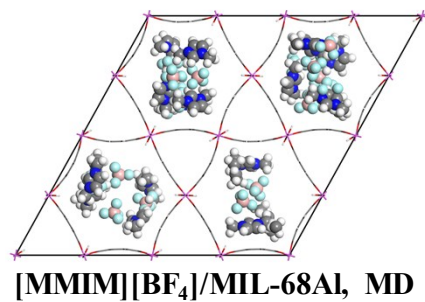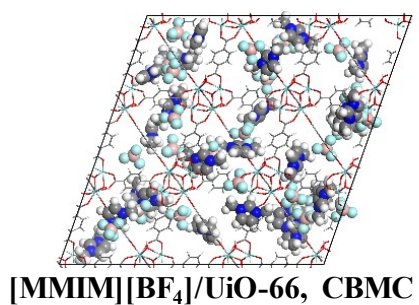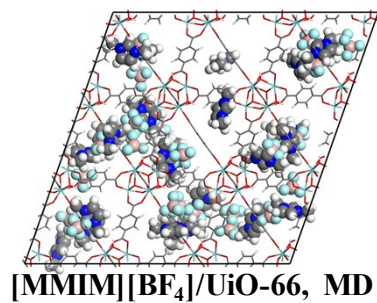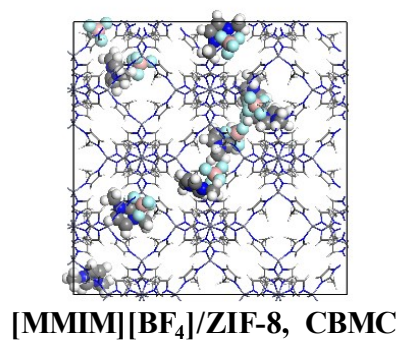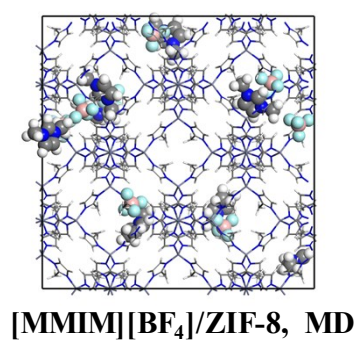

**Fig. S5** Configurations of CBMC- and MD- derived [MMIM][BF<sub>4</sub>]/MOFs.

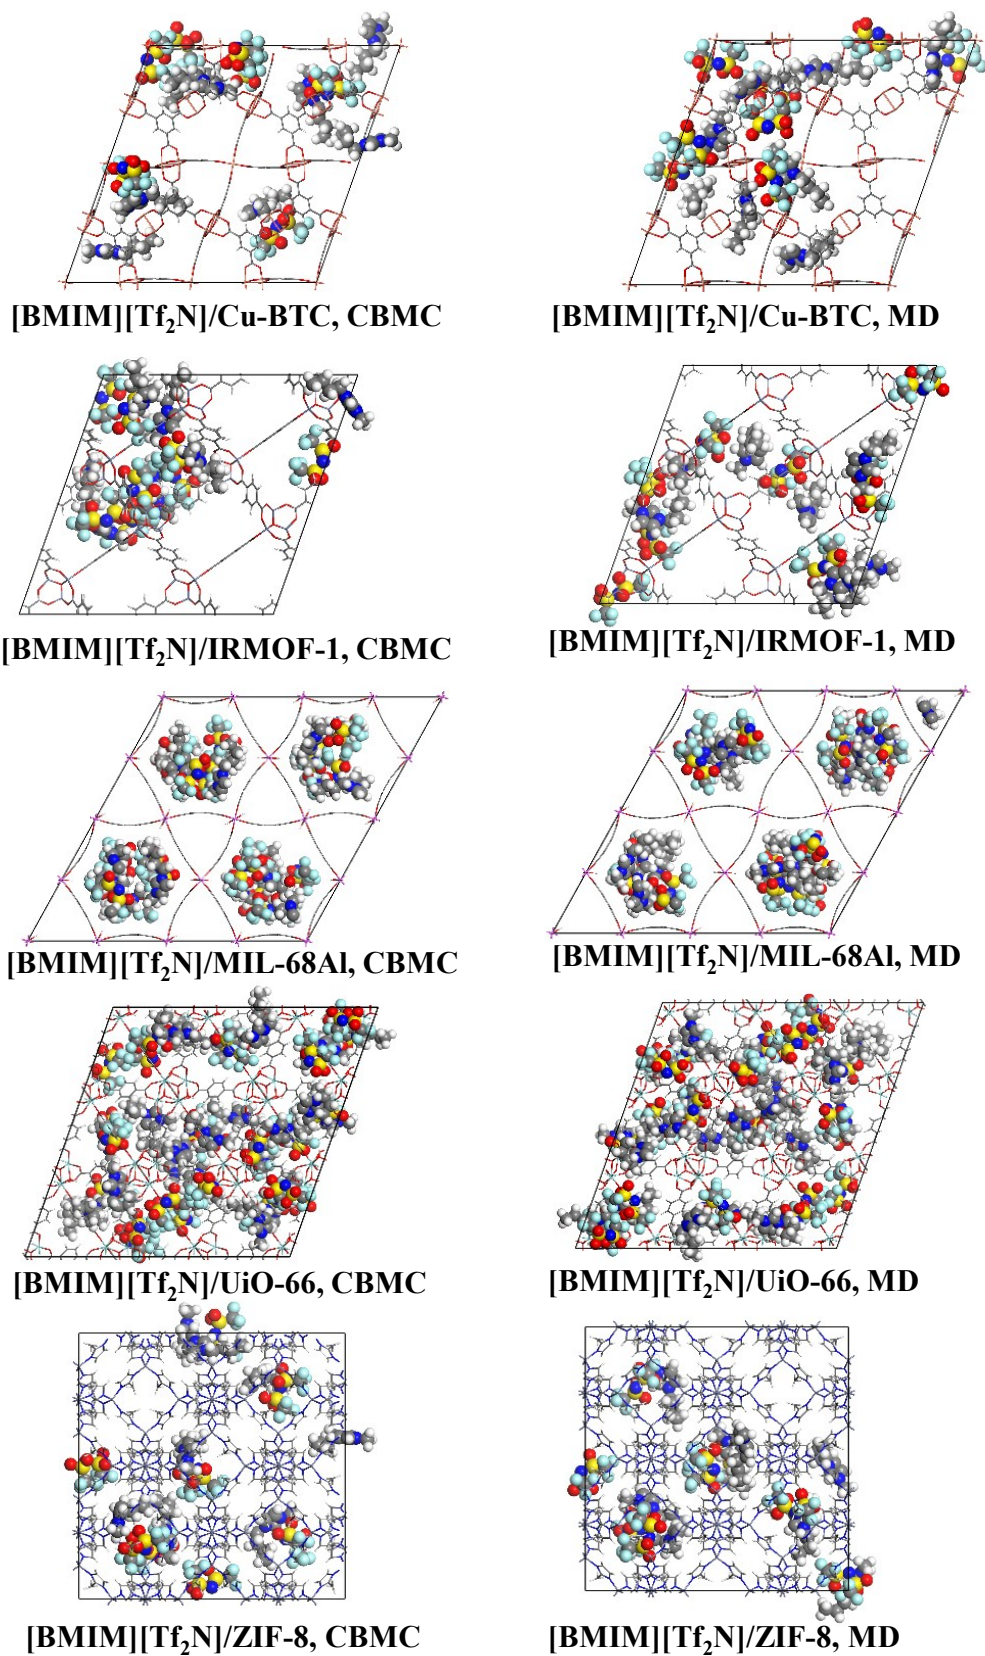

**Fig. S6** Configurations of CBMC- and MD- derived [BMIM][Tf<sub>2</sub>N]/MOFs.

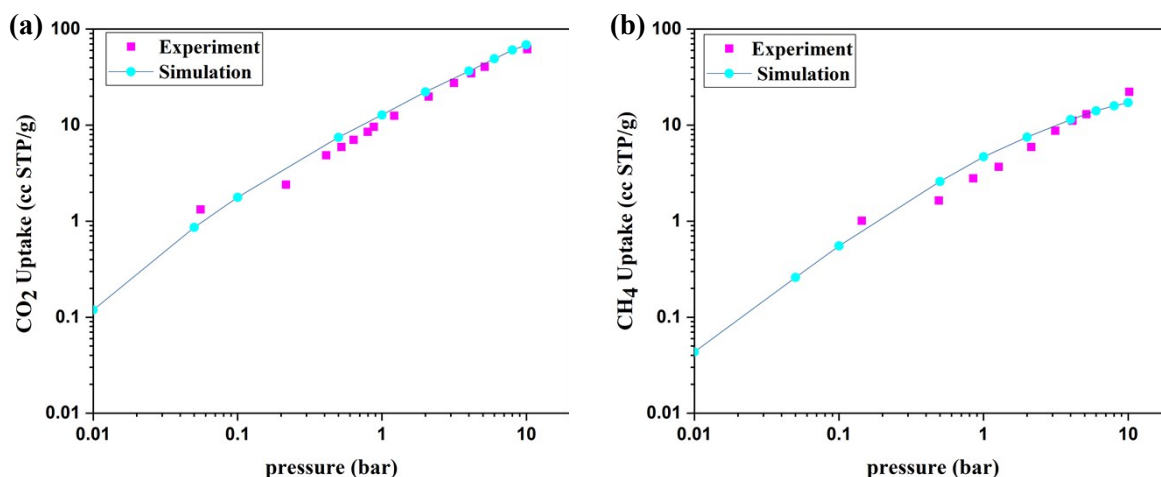

**Fig. S7** Gas uptake of [BMIM][BF<sub>4</sub>]/ZIF-8 composite from experimental results<sup>1</sup> and GCMC simulations. (a) [BMIM][BF<sub>4</sub>] amount of 25 wt% for CO<sub>2</sub> and (b) [BMIM][BF<sub>4</sub>] amount of 28 wt% for CH<sub>4</sub>. The simulation data is multiplied by the same pressure-dependent factor used in the reported work.

**Table S4.** CO<sub>2</sub>/CH<sub>4</sub> separation performance and geometrical features of the top 2 [BMIM][Tf<sub>2</sub>N]/MOF composites and the corresponding original MOFs.

| Structure name                                                                                   | $S_{CO_2/CH_4}$ | $N_{CO_2}$<br>(mmol g <sup>-1</sup> ) | PLD<br>(Å) | LCD<br>(Å) | $S_{acc}$<br>(m <sup>2</sup> g <sup>-1</sup> ) | $V_f$<br>(cm <sup>3</sup> g <sup>-1</sup> ) |
|--------------------------------------------------------------------------------------------------|-----------------|---------------------------------------|------------|------------|------------------------------------------------|---------------------------------------------|
| Zn <sub>2</sub> O <sub>8</sub> -BTC_B-irmof7_A_No16                                              | 44.5            | 7.6                                   | 4.3        | 6.1        | 1674.0                                         | 0.64                                        |
| [BMIM][Tf <sub>2</sub> N]/<br>Zn <sub>2</sub> O <sub>8</sub> -BTC_B-irmof7_A_No16                | 50.5            | 4.0                                   | 4.3        | 6.1        | 163.1                                          | 0.40                                        |
| Zn <sub>2</sub> O <sub>8</sub> N <sub>2</sub> -irmof8_A-TePM_No117                               | 37.7            | 7.4                                   | 4.9        | 5.61       | 1688.4                                         | 0.59                                        |
| [BMIM][Tf <sub>2</sub> N]/<br>Zn <sub>2</sub> O <sub>8</sub> N <sub>2</sub> -irmof8_A-TePM_No117 | 43.9            | 4.5                                   | 4.9        | 5.61       | 687.5                                          | 0.43                                        |

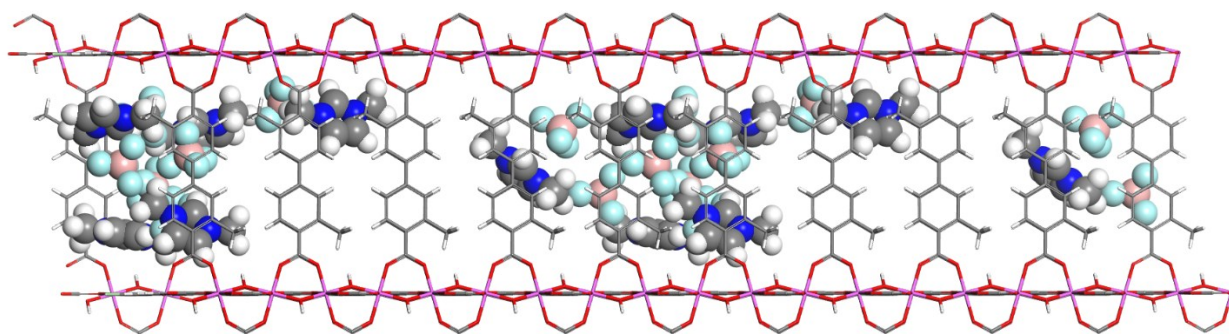

**Fig. S8** Representative configuration of IL incorporated in **sql**-MOFs with PLD larger than 10 Å.

## Reference

1. B. Koyuturk, C. Altintas, F. P. Kinik, S. Keskin and A. Uzun, *J. Phys. Chem. C*, 2017, 121, 10370-10381.
